# Supplementary material for: Simultaneous profiling of full-length RNA transcripts and chromatin accessibility within single cells of human retinal organoids
Source: Research Square preprint supplement (doi:10.21203/rs.3.rs-3640234/v1), 2023-12-20
Supplement: Supplementary file 1 [file 48f51d25884816a456ff68ca.xlsx]

## Sheet: Sheet1
Comparison of scRICA-seq and other methods
Method	Amplification	Sequencing platform	No. of cells in a library	Cell capture efficiency	No. of UMIs per cell	No. of genes per cell	No. of full length genes per cell	Experiment cost per cell (excluding sequencing cost)
SCAN-seq2	Modified Smart-seq2	Nanopore	96-960	0.888	39586	--	>4,000	1
R2C2	Smart-seq2	Nanopore	1-96	0.64	--	--	532	7
ScISOr-Seq	10x genomics	NGS+Pacbio	>5,000	0.4	260	--	129	0.3
ScNaUmi-seq	10x genomics	NGS+Nanopore	100-1,000	0.4	6047	--	2427	5
RAGE-seq	10x genomics	NGS+Nanopore	2,500-6,000	0.187	--	--	TCR/BCR mRNA	0.5
scCOLOR-seq	Drop-seq	Nanopore	500-1,200	0.1	2000	--	500	0.06
scRCAT-seq2(ES)	Modified smart-seq3	illumina	1-96	--	256177	12309	2941	$39(38.4+0.6*number of cells)
scRICA-seq(D45)	10x genomics	illumina	12344	--	3692	1797	--	0.15
