# Supplementary material for: Simultaneous profiling of full-length RNA transcripts and chromatin accessibility within single cells of human retinal organoids
Source: Research Square preprint supplement (doi:10.21203/rs.3.rs-3640234/v1), 2023-12-20
Supplement: Supplementary file 2 [file 7eb2fe8192cfaf5eafa156dc.xlsx]

## Sheet: Sheet1
Table of scRICA-seq primers
ES cell sample
Name	Sequence (5′-3′)
Oligo(dT) primer	AAGCAGTGGTATCAACGCAGAGT(N)n(N)12AGTTAACGCTATACGGCACGCG(T)30VN
TSO primer	GCAATGAAGTCGCAGGGTTG/rG//rG//rG/
linker primer	ACTCTGCGTTGATACCACTGCTTGCAATGAAGTCGCAGGGTTG
oligo primer	AAGCAGTGGTATCAACGCAGAGT
Phi29 primer	GCAATGAAGTCGCAGGGTTG
Tn5-i5 primer	TCGTCGGCAGCGTCAGATGT
Tn5-i7 primer	GTCTCGTGGGCTCGGAGATG
anti-tag1 primer	CGCGTGCCGTATAGCGTTAACT
anti-TSO primer	CAACCCTGCGACTTCATTGC
i7-anti-atg1 primer	GTCTCGTGGGCTCGGAGATGTGTATAAGAGACAGCGCGTGCCGTATAGCGTTAACT
i7-anti-TSO primer	GTCTCGTGGGCTCGGAGATGTGTATAAGAGACAGCAACCCTGCGACTTCATTGC
Index 1 primer(N7)	CAAGCAGAAGACGGCATACGAGAT(N)8GTCTCGTGGGCTCGGAGATGTGTATAAGAGACAG
Index 2 primer(N5)	AATGATACGGCGACCACCGAGATCTACAC(N)8TCGTCGGCAGCGTCAGATGTGTATAAGAGACAG
D45 human retinal organoids
Name	Sequence (5′-3′)	Primer names corresponding to the ES cell sample
10X-linker primer	ATGTACTCTGCGTTGATACCACTGCTTCTACACGACGCTCTTCCGATCT	linker primer
10X-Phi29 primer	ATGTACTCTGCGTTGATACCACTGCTT	Phi29 primer
10X-anti-TSO	CTGCGTTGATACCACTGCTT	anti-TSO primer
10X-polyA	GACAGAAAAAAAAAAAAAAAAAAAAAAAAAAAAAA	anti-tag1 primer
10X-i7-anti-TSO	GTCTCGTGGGCTCGGAGATGTGTATAAGAGACAGCTGCGTTGATACCACTGCTT	i7-anti-TSO primer
10X-i5-polyA	TCGTCGGCAGCGTCAGATGTGTATAAGAGACAGAAAAAAAAAAAAAAAAAAAAAAAAAAAAAA	i7-anti-atg1 primer
